# Supplementary material for: An effective integrated method for comprehensive identification of eighty-five compounds in Zhi-Zi-Da-Huang decoction by HPLC-DAD-ESI-MS (TOF) and HPLC-DAD-ESI-MS/MS (QqQ) without the help of reference standards
Source: Royal Society of Chemistry journal article supplement (doi:10.1039/c4ay00219a), 2014-01-01
Supplement: c4ay00219a1.pdf [file c4ay00219a1.pdf]

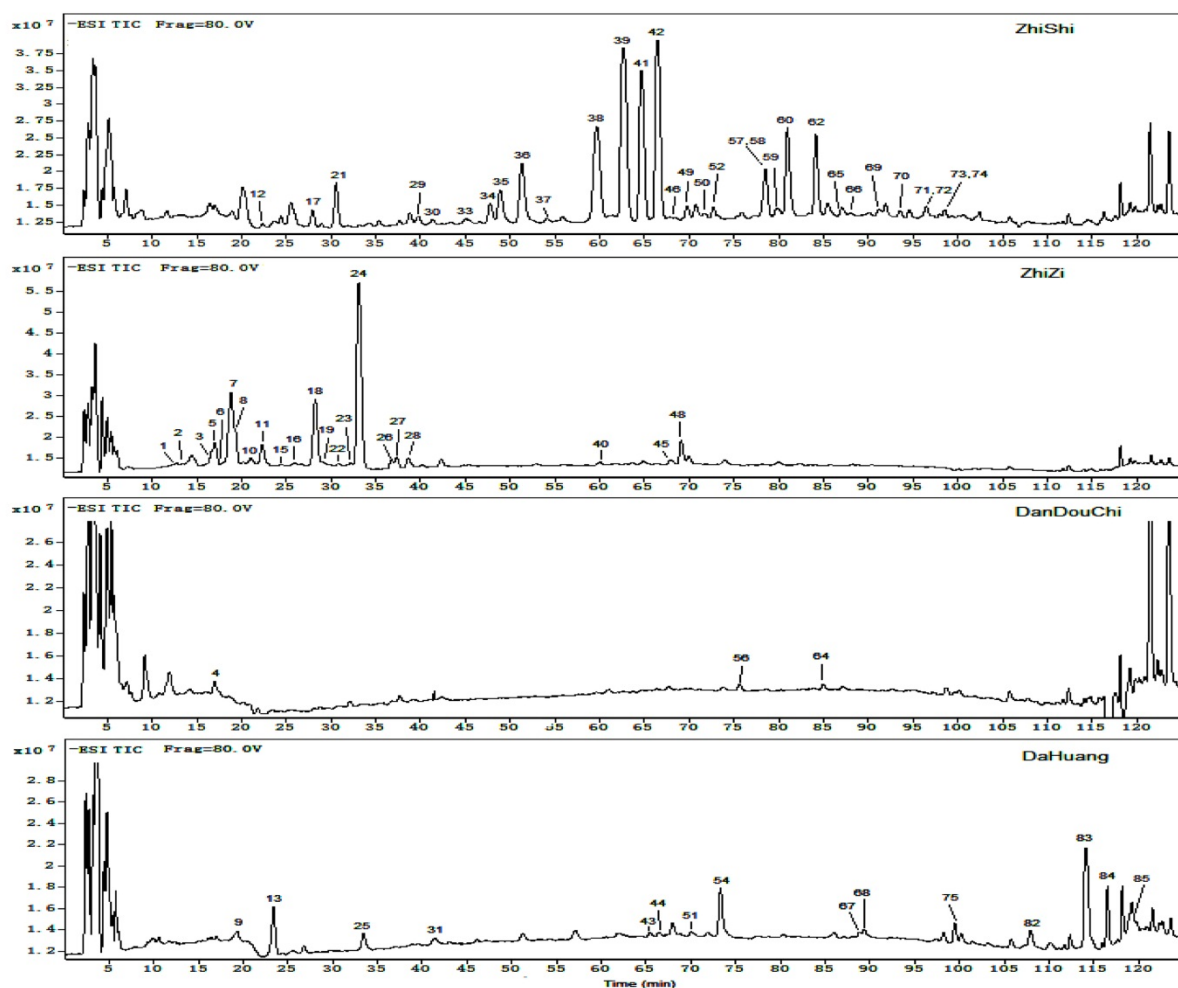

Fig. A (1) The total ion chromatograms of four individual herbs in negative ion mode.

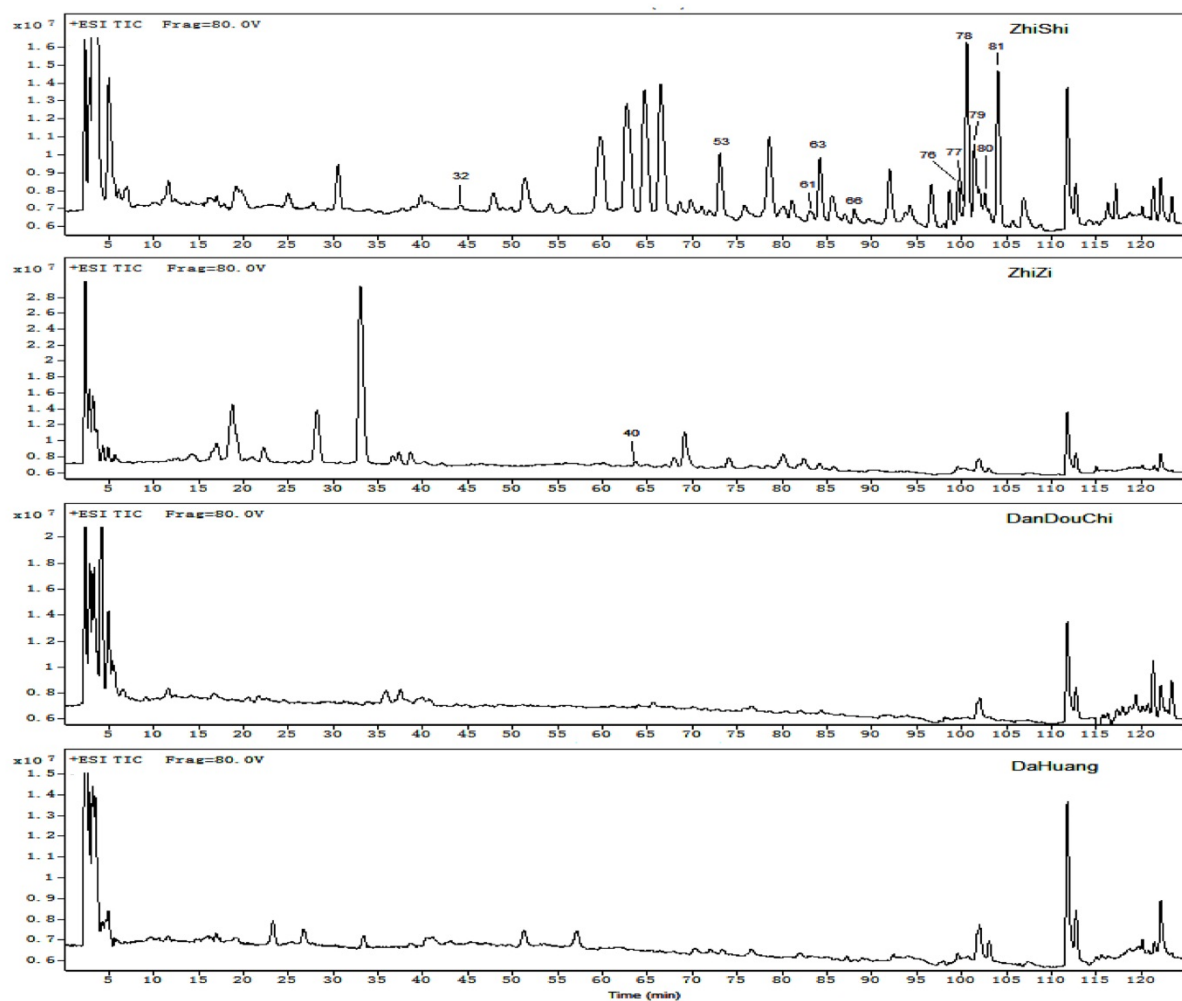

Fig. A (2) The total ion chromatograms of four individual herbs in positive ion mode.
